# Supplementary material
Source: PubMed Central journal article supplement (PMC4662888)

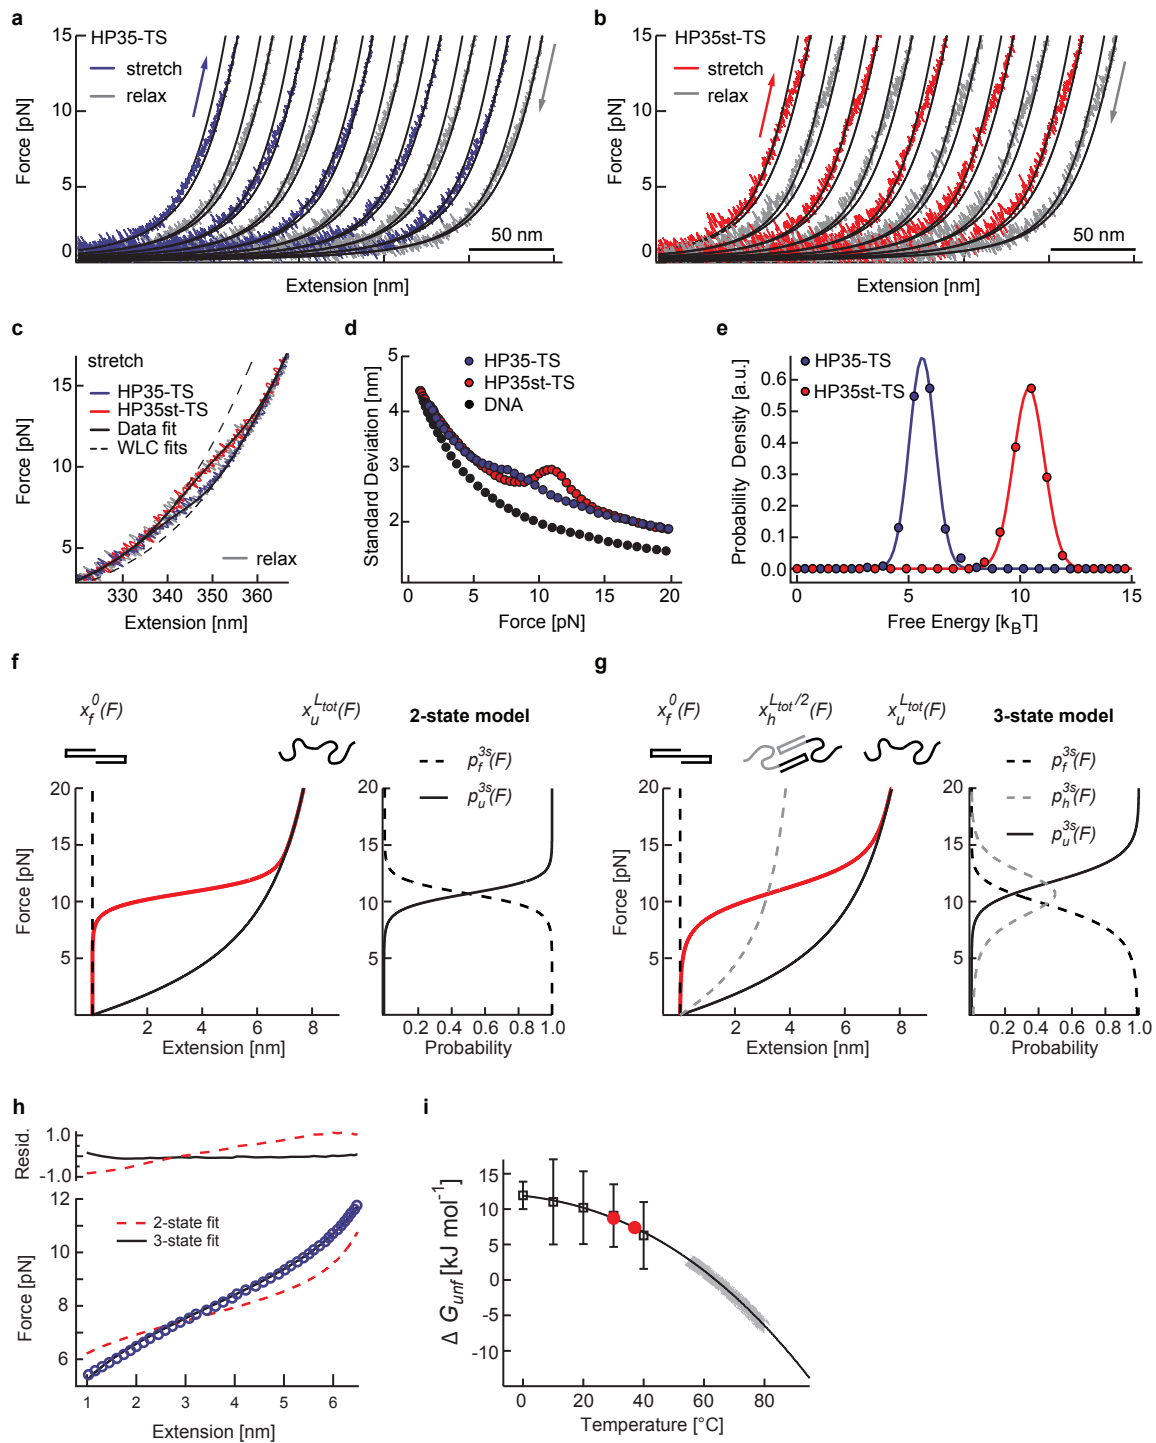

Grashoff Supplementary Figure 1

Supplement: NIHMS729656-supplement-3.pdf [file NIHMS729656-supplement-3.pdf]

**a**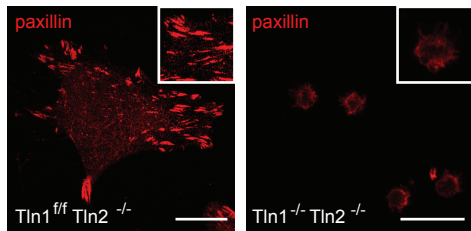**b**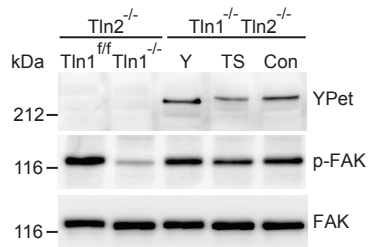**c**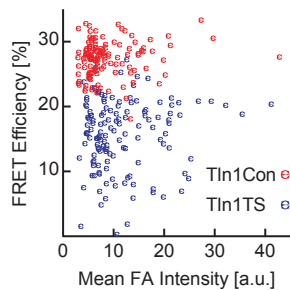**d**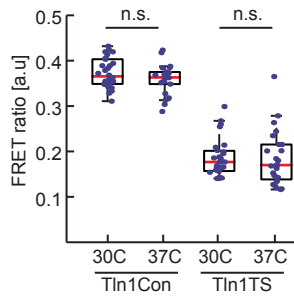**e**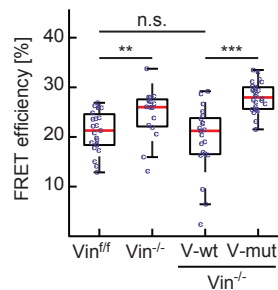

**Grashoff Supplementary Figure 2**

Supplement: NIHMS729656-supplement-4.pdf [file NIHMS729656-supplement-4.pdf]

**a**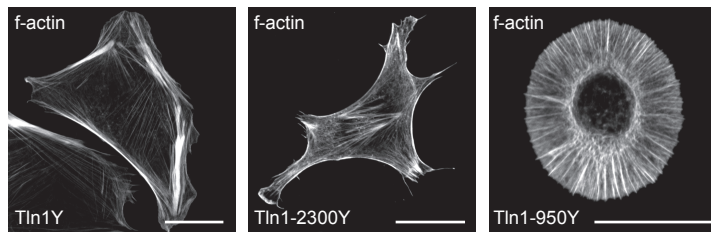**b**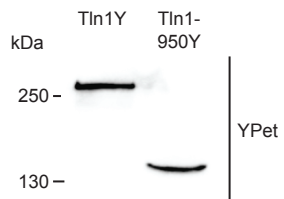**c**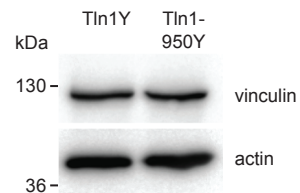

Grashoff Supplementary Figure 3

Supplement: NIHMS729656-supplement-5.pdf [file NIHMS729656-supplement-5.pdf]

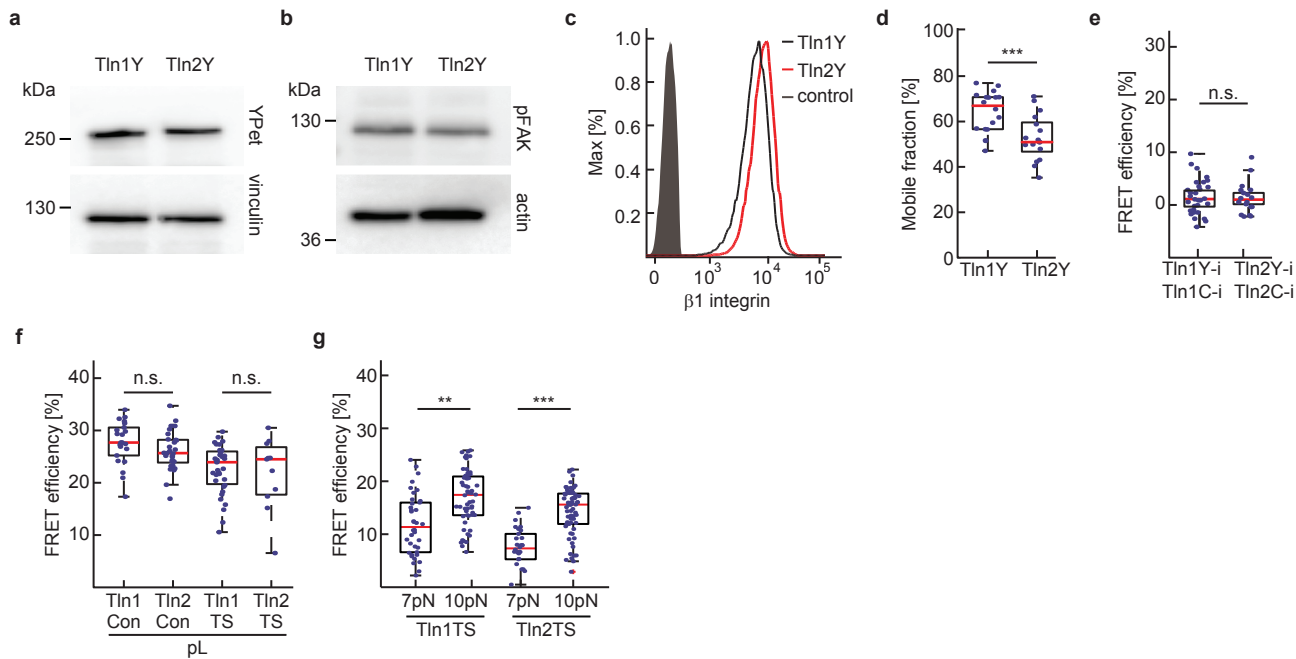

Grashoff Supplementary Figure 4

Supplement: NIHMS729656-supplement-6.pdf [file NIHMS729656-supplement-6.pdf]

### Supplementary Fig. 2b

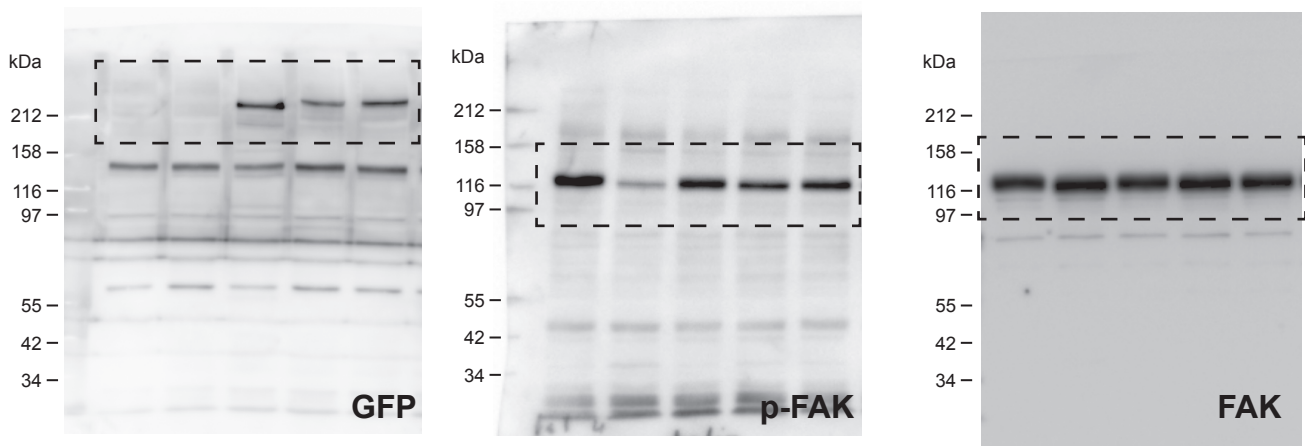

### Supplementary Fig. 3b, c

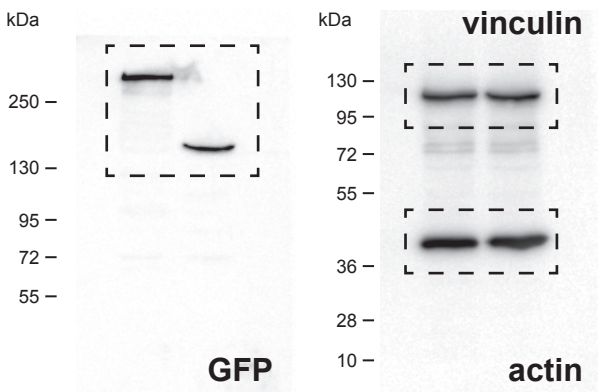

### Supplementary Fig. 4a, b

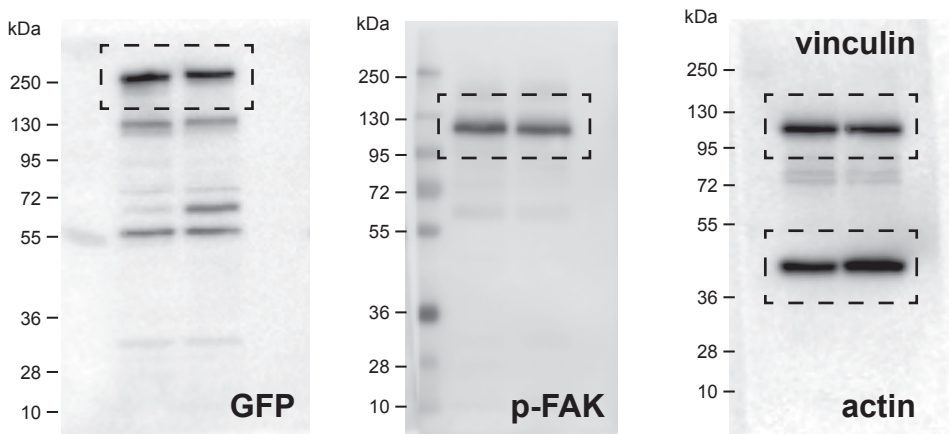

Supplement: NIHMS729656-supplement-7.pdf [file NIHMS729656-supplement-7.pdf]
